# Supplementary material for: Secondary metabolites of Livistona decipiens as potential inhibitors of SARS-CoV-2
Source: Royal Society of Chemistry journal article supplement (doi:10.1039/d2ra01306a), 2022-01-01
Supplement: d2ra01306a1.pdf [file d2ra01306a1.pdf]

1 **Table 1.** LC–HR–ESIMS dereplication results of the alcoholic extract of *Livistona decipens*  
2 leaves and fruits

3

| No. | Metabolite name             | <i>L. decipens</i> |        | RT (min.) | MF                                              | <i>m/z</i> | Calculated <i>m/z</i> |
|-----|-----------------------------|--------------------|--------|-----------|-------------------------------------------------|------------|-----------------------|
|     |                             | Leaves             | Fruits |           |                                                 |            |                       |
| 1   | $\rho$ -Hydroxybenzoic acid | ×                  | ✓      | 2.0135    | C <sub>7</sub> H <sub>6</sub> O <sub>3</sub>    | 137.0238   | 138.0317              |
| 2   | Syringol                    | ×                  | ✓      | 2.0486    | C <sub>8</sub> H <sub>10</sub> O <sub>3</sub>   | 153.0557   | 154.0629              |
| 3   | Neochlorogenic acid         | ✓                  | ✓      | 2.2486    | C <sub>16</sub> H <sub>18</sub> O <sub>9</sub>  | 353.0881   | 354.0951              |
| 4   | Isoorientin                 | ✓                  | ✓      | 2.3678    | C <sub>21</sub> H <sub>20</sub> O <sub>11</sub> | 447.0932   | 448.1006              |
| 5   | Caffeic acid                | ✓                  | ✓      | 2.3739    | C <sub>9</sub> H <sub>8</sub> O <sub>4</sub>    | 179.0346   | 180.0422              |
| 6   | (+)-Catechin                | ✓                  | ✓      | 2.4451    | C <sub>15</sub> H <sub>14</sub> O <sub>6</sub>  | 289.0713   | 290.0790              |
| 7   | Vitexin                     | ✓                  | ×      | 2.6408    | C <sub>21</sub> H <sub>20</sub> O <sub>10</sub> | 431.0974   | 432.1056              |
| 8   | Isoquercetin                | ✓                  | ✓      | 2.7137    | C <sub>21</sub> H <sub>20</sub> O <sub>12</sub> | 463.0876   | 464.0955              |
| 9   | Quercetin                   | ×                  | ✓      | 2.7605    | C <sub>15</sub> H <sub>10</sub> O <sub>7</sub>  | 301.0351   | 302.0427              |
| 10  | (-)-Epiafzelechin           | ×                  | ✓      | 2.9733    | C <sub>15</sub> H <sub>14</sub> O <sub>5</sub>  | 273.0766   | 274.0841              |
| 11  | Tricin                      | ×                  | ✓      | 3.8475    | C <sub>17</sub> H <sub>14</sub> O <sub>7</sub>  | 329.0658   | 330.0739              |
| 12  | Luteolin                    | ✓                  | ✓      | 4.2993    | C <sub>15</sub> H <sub>10</sub> O <sub>6</sub>  | 285.0763   | 286.0477              |

4

5 MF: molecular formula, RT: retention time, min: minute.

6

7

8

9

10 **Table 2:** Predicted binding free energy ( $\Delta G$ ) in kcal/mol for dereplicated compounds with the  
 11 active site of COVID-19 virus M<sup>pro</sup> (PDB 7BQY; co-crystallized with N3) compared to two  
 12 structurally similar COVID-19 virus M<sup>pro</sup> inhibitors, namely cinanserin and shikonin.

13

14

| Ligand                                               | Predicted $\Delta G$<br>(kcal/mol) COVID-19<br>virus M <sup>pro</sup> | <i>In vitro</i> COVID-19<br>virus M <sup>pro</sup> IC <sub>50</sub><br>( $\mu\text{M}$ ) <sup>a</sup> | Antiviral activity<br>determined by<br>qRT-PCR ( $\mu\text{M}$ ) <sup>a</sup> |
|------------------------------------------------------|-----------------------------------------------------------------------|-------------------------------------------------------------------------------------------------------|-------------------------------------------------------------------------------|
| <b>Isoquercetin (8)</b>                              | -8.2                                                                  | ND <sup>b</sup>                                                                                       | ND <sup>b</sup>                                                               |
| <b>Vitexin (7)</b>                                   | -7.6                                                                  | ND <sup>b</sup>                                                                                       | ND <sup>b</sup>                                                               |
| <b>Isoorientin (4)</b>                               | -7.6                                                                  | ND <sup>b</sup>                                                                                       | ND <sup>b</sup>                                                               |
| <b>Cinanserin</b>                                    | -6.9                                                                  | 124.93 $\pm$ 7.89                                                                                     | 20.61 $\pm$ 0.97                                                              |
| <b>Neochlorogenic acid (3)</b>                       | -6.8                                                                  | ND <sup>b</sup>                                                                                       | ND <sup>b</sup>                                                               |
| <b>Tricin (11)</b>                                   | -6.7                                                                  | ND <sup>b</sup>                                                                                       | ND <sup>b</sup>                                                               |
| <b>Shikonin</b>                                      | -6.5                                                                  | 15.75 $\pm$ 8.22                                                                                      | ND <sup>b</sup>                                                               |
| <b>Quercetin (9)</b>                                 | -6.4                                                                  | ND <sup>b</sup>                                                                                       | ND <sup>b</sup>                                                               |
| <b>Luteolin (12)</b>                                 | -6.2                                                                  | ND <sup>b</sup>                                                                                       | ND <sup>b</sup>                                                               |
| <b>Epiafzelechin (10)</b>                            | -6.2                                                                  | ND <sup>b</sup>                                                                                       | ND <sup>b</sup>                                                               |
| <b>Catechin (6)</b>                                  | -5.8                                                                  | ND <sup>b</sup>                                                                                       | ND <sup>b</sup>                                                               |
| <b>Caffeic acid (5)</b>                              | -4.8                                                                  | ND <sup>b</sup>                                                                                       | ND <sup>b</sup>                                                               |
| <b>Syringol (2)</b>                                  | -4.8                                                                  | ND <sup>b</sup>                                                                                       | ND <sup>b</sup>                                                               |
| <b>Aesculetin</b>                                    | -4.7                                                                  | ND <sup>b</sup>                                                                                       | ND <sup>b</sup>                                                               |
| <b><math>\rho</math>-Hydroxybenzoic acid<br/>(1)</b> | -4.4                                                                  | ND <sup>b</sup>                                                                                       | ND <sup>b</sup>                                                               |

<sup>a</sup> *In vitro* COVID-19 virus M<sup>pro</sup> IC<sub>50</sub> and antiviral activity shown as reported (Jin et al. 2020).

<sup>b</sup> ND, not determined.

15

16

17

18

19

20

21

22

23

24

25

26

27

28

29  
30  
31  
32  
33  
34

**Table 3.** Drug-likeness based on Lipinski's rule of five, ADME properties and medicinal chemistry parameters.

| <b>Ligand</b>                    | <b># of violations</b> | <b>Pgp substrate</b> | <b>GI Absorption</b> | <b>Bioavailability score</b> | <b>PAINS alerts</b> |
|----------------------------------|------------------------|----------------------|----------------------|------------------------------|---------------------|
| <b>Isoquercetin (8)</b>          | 2                      | No                   | Low                  | 0.17                         | 1                   |
| <b>Vitexin (7)</b>               | 1                      | No                   | Low                  | 0.55                         | 0                   |
| <b>Isoorientin (4)</b>           | 2                      | No                   | Low                  | 0.17                         | 1                   |
| <b>Cinanserin</b>                | 0                      | No                   | High                 | 0.55                         | 0                   |
| <b>Neochlorogenic acid (3)</b>   | 1                      | No                   | Low                  | 0.11                         | 1                   |
| <b>Tricin (11)</b>               | 0                      | No                   | High                 | 0.55                         | 0                   |
| <b>Shikonin</b>                  | 0                      | No                   | High                 | 0.55                         | 2                   |
| <b>Quercetin (9)</b>             | 0                      | No                   | High                 | 0.55                         | 1                   |
| <b>Luteolin (12)</b>             | 0                      | No                   | High                 | 0.55                         | 1                   |
| <b>Epiarzelechin (10)</b>        | 0                      | Yes                  | High                 | 0.55                         | 0                   |
| <b>Catechin (6)</b>              | 0                      | Yes                  | High                 | 0.55                         | 1                   |
| <b>Caffeic acid (5)</b>          | 0                      | No                   | High                 | 0.56                         | 1                   |
| <b>Syringol (2)</b>              | 0                      | No                   | High                 | 0.55                         | 0                   |
| <b>Aesculetin</b>                | 0                      | No                   | High                 | 0.55                         | 1                   |
| <b>p-Hydroxybenzoic acid (1)</b> | 0                      | No                   | High                 | 0.56                         | 0                   |

35  
36  
37  
38

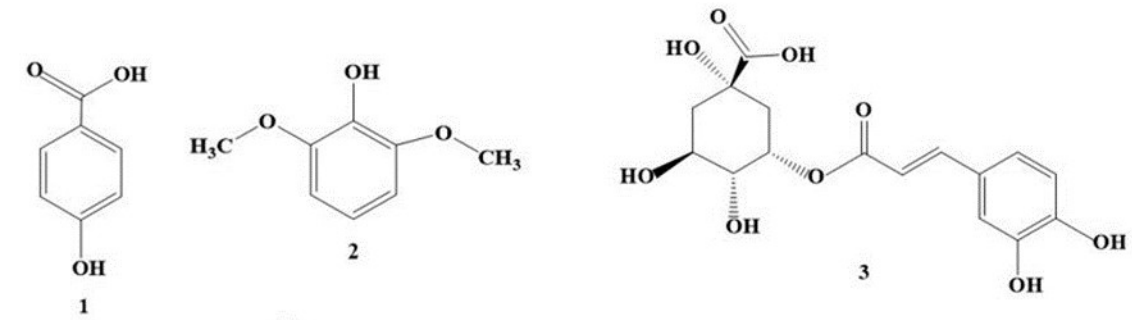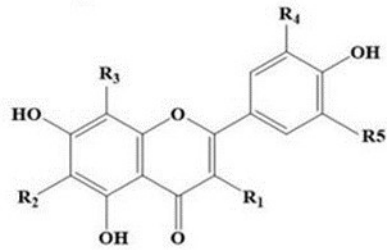

| Compound No. | R <sub>1</sub> | R <sub>2</sub> | R <sub>3</sub> | R <sub>4</sub>   | R <sub>5</sub>   |
|--------------|----------------|----------------|----------------|------------------|------------------|
| 4            | H              | Glucose        | H              | OH               | H                |
| 7            | H              | H              | Glucose        | H                | H                |
| 8            | O—<br>Glucose  | H              | H              | OH               | H                |
| 9            | OH             | H              | H              | OH               | H                |
| 11           | H              | H              | H              | OCH <sub>3</sub> | OCH <sub>3</sub> |
| 12           | H              | H              | H              | OH               | H                |

Compounds 4, 7-9 and 11-12

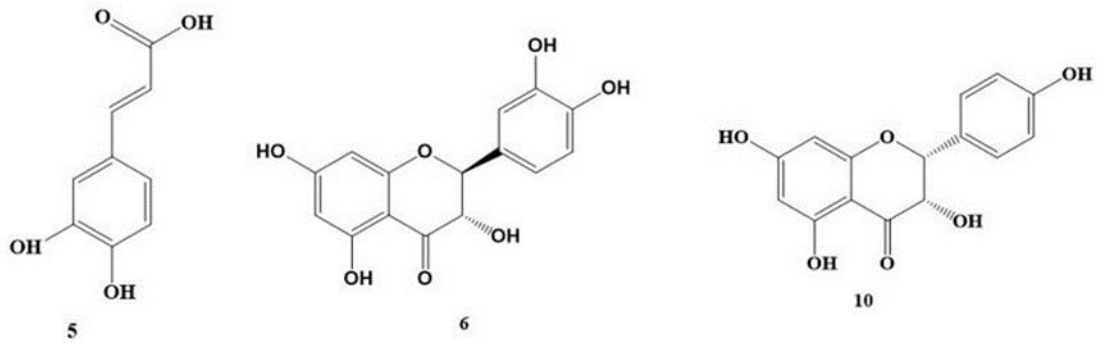

39

40

41 **Figure 1.** Structures of the dereplicated metabolites from the alcoholic extract of *Livistona*

42

*decipens* leaves and fruits

43

44

45

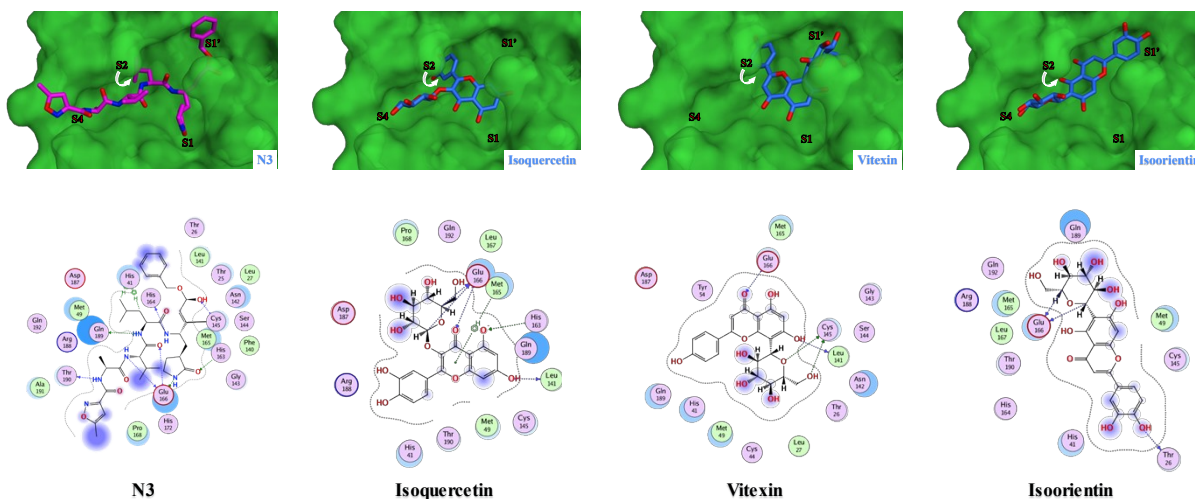

46  
47  
48  
49  
50  
51  
52

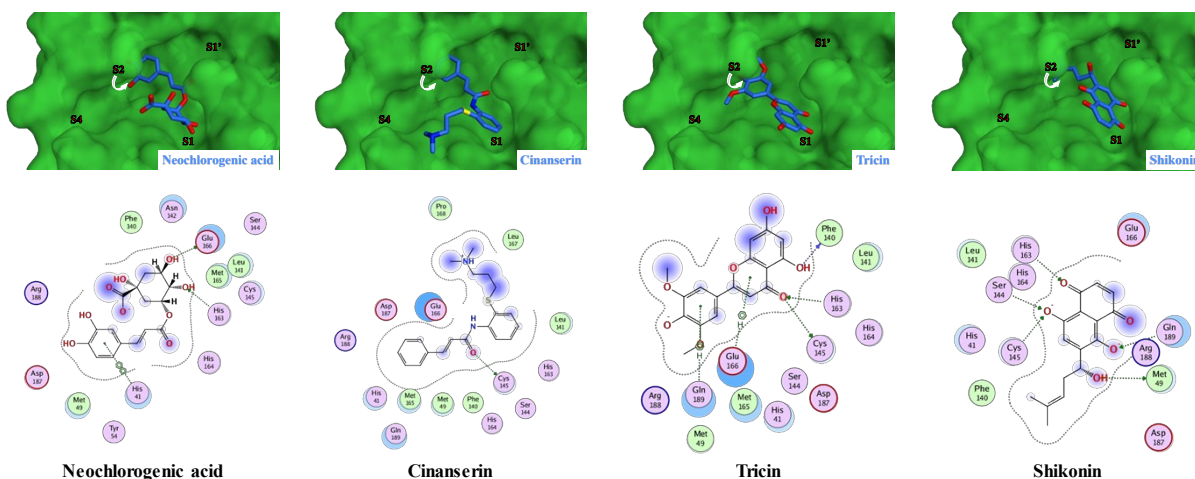

53  
54  
55  
56  
57  
58  
59  
60

**Figure 3.** Predicted 2D/3D docking poses of neochlorogenic acid and triclin compared to their corresponding structurally similar COVID-19 virus M<sup>pro</sup> inhibitors, namely cinanserin and shikonin showing their binding interactions with the key amino acids in the active site of COVID-19 virus M<sup>pro</sup>. M<sup>pro</sup> is shown as green background and ligands are in blue.

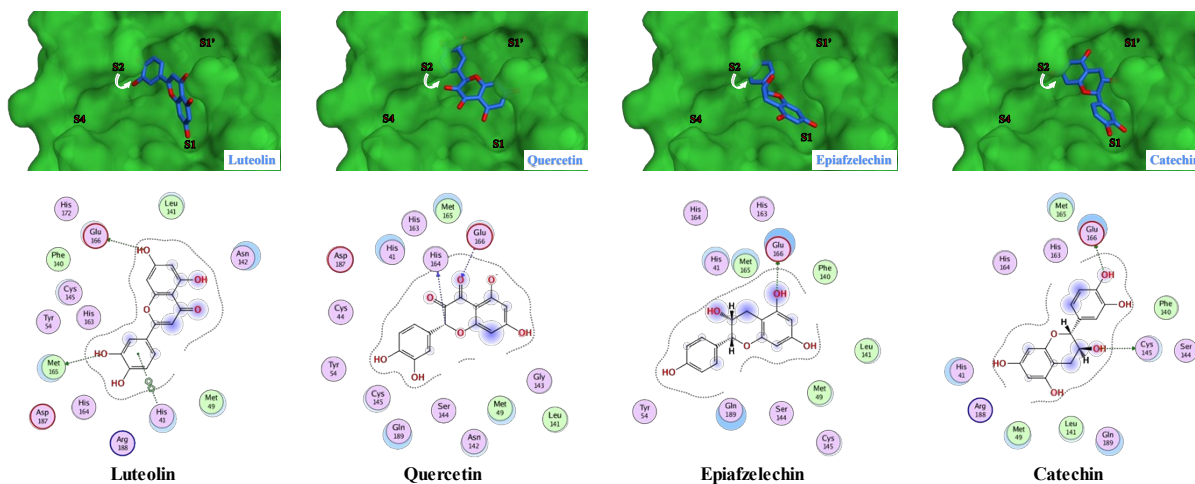

61  
62  
63  
64  
65  
66  
67

**Figure 4.** Predicted 2D/3D docking poses of four flavonoids (luteolin, quercetin, epiafzelechin and catechin) showing their binding interactions with the key amino acids in the active site of COVID-19 virus M<sup>pro</sup>. M<sup>pro</sup> is shown as green background and ligands are in blue.

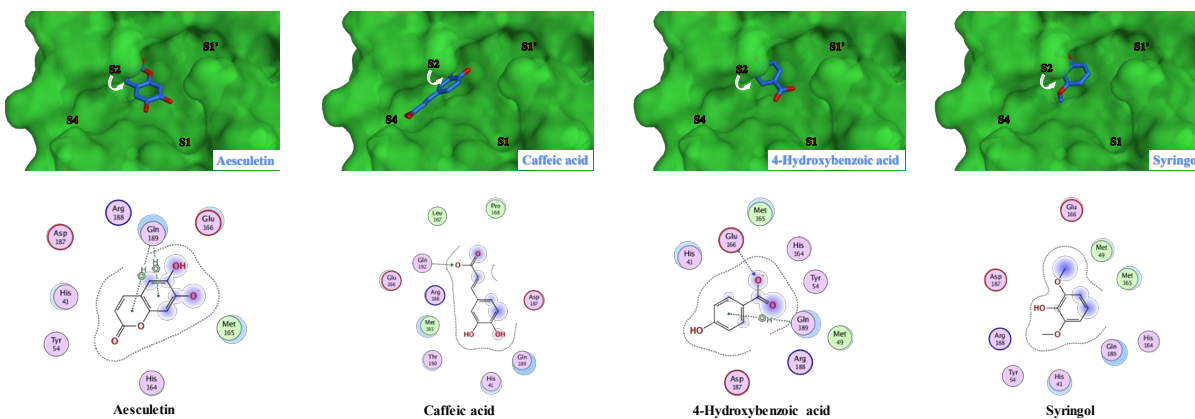

68  
69  
70  
71  
72

**Figure 5.** Predicted 2D/3D docking poses of four dereplicated compounds (aesculetin, caffeic acid, 4-hydroxybenzoic acid and syringol) showing their binding interactions with the key amino acids in the active site of COVID-19 virus M<sup>pro</sup>. M<sup>pro</sup> is shown as green background and ligands are in blue.
